# Supplementary figures and images for: DYT1 dystonia increases risk taking in humans
Source: eLife journal article supplement (doi:10.7554/elife.14155), 2016-06-01

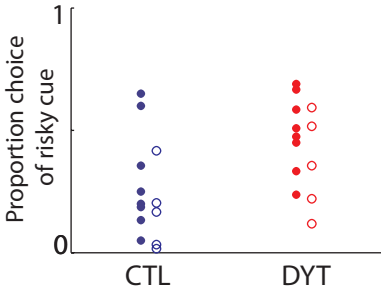

Supplement: supp [file elife-14155-supp-v1.zip]

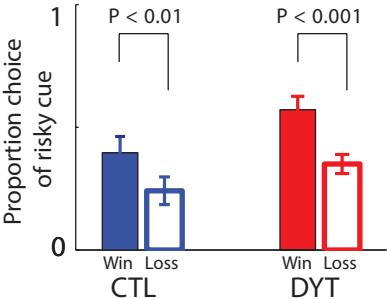

Supplement: supp [file elife-14155-supp-v1.zip]

a

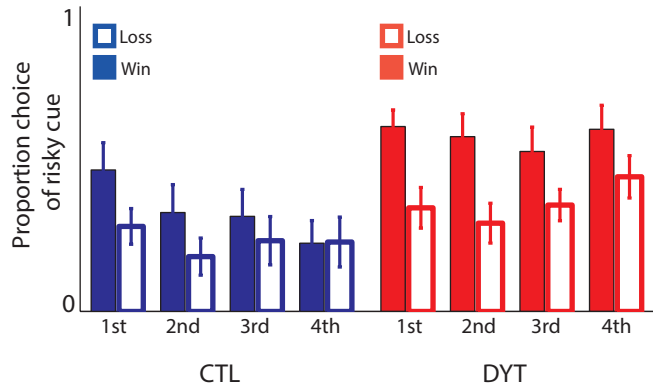

b

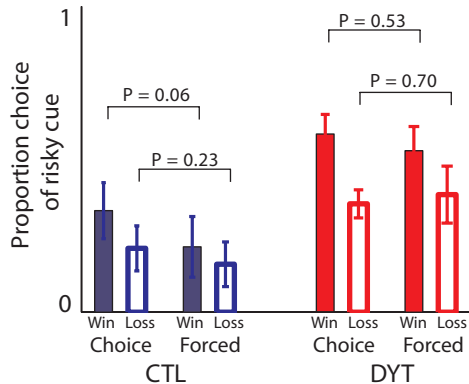

Supplement: supp [file elife-14155-supp-v1.zip]

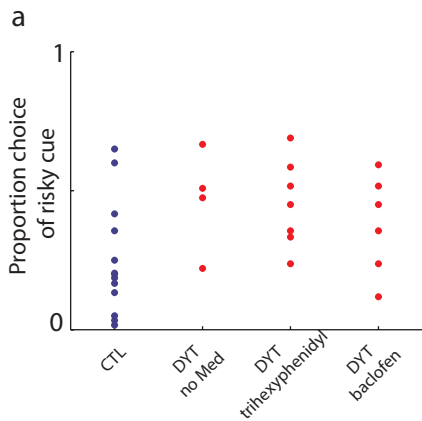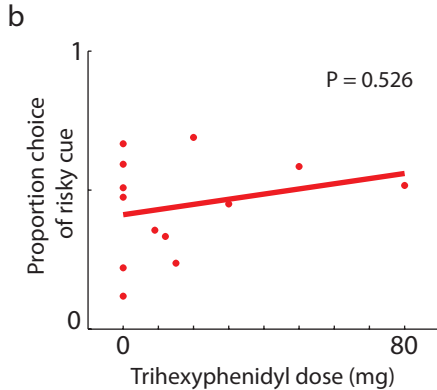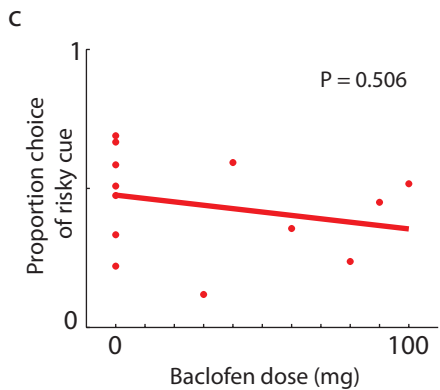

Supplement: supp [file elife-14155-supp-v1.zip]
